# Supplementary material for: Functional connectivity-based subtypes of individuals with and without autism spectrum disorder
Source: PubMed Central journal article supplement (PMC6370474; doi:10.1162/netn_a_00067), 2019-02-01
Supplement: netn-03-344-s001.pdf [file netn-03-344-s001.pdf]

**SUPPLEMENTARY MATERIALS**

**Supplementary Table 1: Participant characteristics by site**

|                       | NYU                            |                                | SDSU                            |                                 | TRINITY                         |                                 | UM                             |                                | USM                             |                                 |
|-----------------------|--------------------------------|--------------------------------|---------------------------------|---------------------------------|---------------------------------|---------------------------------|--------------------------------|--------------------------------|---------------------------------|---------------------------------|
| Variable              | ASD<br>Mean ± SD<br>[range]    | TD<br>Mean ± SD<br>[range]     | ASD<br>Mean ± SD<br>[range]     | TD<br>Mean ± SD<br>[range]      | ASD<br>Mean ± SD<br>[range]     | TD<br>Mean ± SD<br>[range]      | ASD<br>Mean ± SD<br>[range]    | TD<br>Mean ± SD<br>[range]     | ASD<br>Mean ± SD<br>[range]     | TD<br>Mean ± SD<br>[range]      |
| N                     | 59                             | 52                             | 11                              | 10                              | 18                              | 16                              | 26                             | 29                             | 31                              | 14                              |
| Age                   | 14.49 ± 6.80<br>[7.13 – 39.10] | 15.79 ± 6.66<br>[6.47 – 31.78] | 15.00 ± 1.74<br>[12.13 – 17.15] | 14.48 ± 1.31<br>[12.58 – 16.57] | 16.69 ± 2.54<br>[13.58 – 21.42] | 16.88 ± 4.15<br>[12.04 – 25.66] | 13.92 ± 2.31<br>[9.20 – 18.60] | 14.11 ± 3.75<br>[8.20 – 26.80] | 22.75 ± 6.85<br>[11.35 – 35.71] | 21.04 ± 6.06<br>[12.94 – 31.28] |
| IQ                    | 108.47 ± 15.35<br>[80 – 148]   | 110.62 ± 11.87<br>[80 – 132]   | 116.36 ± 16.82<br>[81 – 141]    | 109.00 ± 9.85<br>[93 – 126]     | 110.50 ± 14.41<br>[89 – 135]    | 107.88 ± 13.88<br>[89 – 133]    | 109.44 ± 17.97<br>[77 – 147.5] | 110.29 ± 8.06<br>[93.5 – 129]  | 99.45 ± 15.36<br>[76 – 132]     | 110.93 ± 14.25<br>[89 – 130]    |
| Mean FD               | 0.07 ± 0.03<br>[0.03 – 0.14]   | 0.06 ± 0.03<br>[0.04 – 0.19]   | 0.06 ± 0.04<br>[0.02 – 0.14]    | 0.06 ± 0.02<br>[0.04 – 0.09]    | 0.09 ± 0.02<br>[0.07 – 0.14]    | 0.08 ± 0.02<br>[0.06 – 0.11]    | 0.07 ± 0.03<br>[0.02 – 0.16]   | 0.07 ± 0.03<br>[0.04 – 0.14]   | 0.09 ± 0.05<br>[0.02 – 0.19]    | 0.10 ± 0.03<br>[0.06 – 0.15]    |
| Percent FD<br>> 0.2mm | 4.17 ± 4.70<br>[0 – 18.00]     | 3.26 ± 3.93<br>[0 – 18.00]     | 4.24 ± 6.16<br>[0 – 19.33]      | 1.80 ± 1.44<br>[0 – 4.67]       | 4.33 ± 3.42<br>[0 – 10.67]      | 3.71 ± 4.29<br>[0 – 16.67]      | 3.92 ± 4.67<br>[0 – 18]        | 4.32 ± 4.44<br>[0 – 16]        | 6.69 ± 6.91<br>[0 – 18.67]      | 7.29 ± 5.09<br>[0 – 19.33]      |
| Handedness            | 44 RH<br>14 LH                 | 48 RH<br>4 LH                  | 10 RH<br>1 LH                   | 8 RH<br>2 LH                    | 18 RH<br>0 LH                   | 16 RH<br>0 LH                   | 26 RH<br>0 LH                  | 29 RH<br>0 LH                  | 29 RH<br>2 LH                   | 14 RH<br>0 LH                   |
| Eye status            | 53 open<br>6 closed            | 42 open<br>10 closed           | 11 open<br>0 closed             | 10 open<br>0 closed             | 0 open<br>18 closed             | 0 open<br>16 closed             | 19 open<br>4 closed            | 23 open<br>4 closed            | 31 open<br>0 closed             | 14 open<br>0 closed             |
| Medication use        | 14 yes<br>45 no<br>0 unknown   | 0 yes<br>52 no<br>0 unknown    | 1 yes<br>10 no<br>0 unknown     | 0 yes<br>10 no<br>0 unknown     | 0 yes<br>18 no<br>0 unknown     | 0 yes<br>16 no<br>0 unknown     | 12 yes<br>13 no<br>1 unknown   | 0 yes<br>28 no<br>1 unknown    | 0 yes<br>0 no<br>31 unknown     | 0 yes<br>0 no<br>14 unknown     |
| Comorbidities         | 28 yes<br>31 no/unknown        | 0 yes<br>52 no/unknown         | 0 yes<br>11 no/unknown          | 0 yes<br>10 no/unknown          | 0 yes<br>18 no/unknown          | 0 yes<br>16 no/unknown          | 0 yes<br>26 no/unknown         | 0 yes<br>29 no/unknown         | 0 yes<br>31 no/unknown          | 0 yes<br>14 no/unknown          |

|                    |                                         |                                       |                                      |     |                                       |     |                                      |     |                                         |                                      |
|--------------------|-----------------------------------------|---------------------------------------|--------------------------------------|-----|---------------------------------------|-----|--------------------------------------|-----|-----------------------------------------|--------------------------------------|
| ADOS Total         | 11.56 ± 4.19<br>[5 – 22]<br>(N = 59)    | N/A                                   | 11.20 ± 3.94<br>[7 – 19]<br>(N = 10) | N/A | 11.22 ± 2.86<br>[7 – 17]<br>(N = 18)  | N/A | N/A                                  | N/A | 12.39 ± 2.64<br>[6 – 18]<br>(N = 31)    | 1.14 ± 1.17<br>[0 – 4]<br>(N = 14)   |
| ADOS Communication | 3.71 ± 1.57<br>[0 – 8]<br>(N = 59)      | N/A                                   | 3.60 ± 2.07<br>[0 – 7]<br>(N = 10)   | N/A | N/A                                   | N/A | N/A                                  | N/A | 4.32 ± 1.28<br>[2 – 7]<br>(N = 31)      | 0.50 ± 0.64<br>[0 – 3]<br>(N = 14)   |
| ADOS Social        | 7.85 ± 3.03<br>[2 – 14]<br>(N = 59)     | N/A                                   | 7.60 ± 3.34<br>[3 – 13]<br>(N = 10)  | N/A | N/A                                   | N/A | N/A                                  | N/A | 8.06 ± 2.22<br>[4 – 12]<br>(N = 31)     | 0.64 ± 0.84<br>[0 – 2]<br>(N = 14)   |
| ADOS RRB           | 2.29 ± 1.52<br>[0 – 7]<br>(N = 59)      | N/A                                   | 2.00 ± 1.15<br>[0 – 4]<br>(N = 10)   | N/A | N/A                                   | N/A | N/A                                  | N/A | 1.55 ± 1.35<br>[0 – 5]<br>(N = 29)      | 0.07 ± 0.27<br>[0 – 1]<br>(N = 14)   |
| ADI-R Social       | 18.96 ± 5.76<br>[7 – 28]<br>(N = 55)    | N/A                                   | 17.89 ± 4.57<br>[12 – 23]<br>(N = 9) | N/A | 20.06 ± 5.87<br>[10 – 30]<br>(N = 18) | N/A | 19.04 ± 4.85<br>[9 – 26]<br>(N = 26) | N/A | N/A                                     | N/A                                  |
| ADI-R Verbal       | 15.39 ± 4.36<br>[8 – 25]<br>(N = 56)    | N/A                                   | 13.11 ± 5.71<br>[2 – 20]<br>(N = 9)  | N/A | 15.44 ± 4.88<br>[8 – 23]<br>(N = 18)  | N/A | 16.08 ± 3.38<br>[9 – 22]<br>(N = 26) | N/A | N/A                                     | N/A                                  |
| ADI-R RRB          | 5.46 ± 2.66<br>[0 – 12]<br>(N = 56)     | N/A                                   | 6.11 ± 1.76<br>[3 – 9]<br>(N = 9)    | N/A | 5.28 ± 2.40<br>[2 – 11]<br>(N = 18)   | N/A | 6.19 ± 2.86<br>[1 – 12]<br>(N = 26)  | N/A | N/A                                     | N/A                                  |
| SRS                | 91.40 ± 30.51<br>[34 – 164]<br>(N = 58) | 23.80 ± 12.36<br>[5 – 56]<br>(N = 35) | N/A                                  | N/A | N/A                                   | N/A | N/A                                  | N/A | 94.74 ± 32.30<br>[26 – 148]<br>(N = 31) | 12.57 ± 8.57<br>[1 – 31]<br>(N = 14) |



**Supplementary Table 2: Dosenbach Atlas (from Dosenbach et al., 2010)**

| ROI # | Label          | MNI Coordinates (x, y, z) |     |     | RSN |
|-------|----------------|---------------------------|-----|-----|-----|
| 1     | aPFC           | -25                       | 51  | 27  | DMN |
| 2     | mPFC           | 0                         | 51  | 32  | DMN |
| 3     | vmPFC          | 6                         | 64  | 3   | DMN |
| 4     | vmPFC          | 9                         | 51  | 16  | DMN |
| 5     | vmPFC          | -6                        | 50  | -1  | DMN |
| 6     | vmPFC          | -11                       | 45  | 17  | DMN |
| 7     | vmPFC          | 8                         | 42  | -5  | DMN |
| 8     | vlPFC          | 46                        | 39  | -15 | DMN |
| 9     | sup frontal    | 23                        | 33  | 47  | DMN |
| 10    | sup frontal    | -16                       | 29  | 54  | DMN |
| 11    | ACC            | 9                         | 39  | 20  | DMN |
| 12    | post cingulate | 1                         | -26 | 31  | DMN |
| 13    | post cingulate | -8                        | -41 | 3   | DMN |
| 14    | post cingulate | -5                        | -43 | 25  | DMN |
| 15    | post cingulate | -5                        | -52 | 17  | DMN |
| 16    | post cingulate | 10                        | -55 | 17  | DMN |
| 17    | post cingulate | -11                       | -58 | 17  | DMN |
| 18    | precuneus      | -3                        | -38 | 45  | DMN |
| 19    | precuneus      | 9                         | -43 | 25  | DMN |
| 20    | precuneus      | 5                         | -50 | 33  | DMN |
| 21    | precuneus      | -6                        | -56 | 29  | DMN |
| 22    | precuneus      | 11                        | -68 | 42  | DMN |
| 23    | IPS            | -36                       | -69 | 40  | DMN |
| 24    | angular gyrus  | 51                        | -59 | 34  | DMN |
| 25    | angular gyrus  | -48                       | -63 | 35  | DMN |
| 26    | fusiform       | 28                        | -37 | -15 | DMN |
| 27    | inf temporal   | 52                        | -15 | -13 | DMN |
| 28    | inf temporal   | -59                       | -25 | -15 | DMN |
| 29    | inf temporal   | -61                       | -41 | -2  | DMN |
| 30    | occipital      | -28                       | -42 | -11 | DMN |
| 31    | occipital      | -9                        | -72 | 41  | DMN |
| 32    | occipital      | 45                        | -72 | 29  | DMN |
| 33    | occipital      | -2                        | -75 | 32  | DMN |
| 34    | occipital      | -42                       | -76 | 26  | DMN |
| 35    | aPFC           | 29                        | 57  | 18  | FPN |

|    |                |     |     |    |     |
|----|----------------|-----|-----|----|-----|
| 36 | aPFC           | -29 | 57  | 10 | FPN |
| 37 | vent aPFC      | 42  | 48  | -3 | FPN |
| 38 | vent aPFC      | -43 | 47  | 2  | FPN |
| 39 | vIPFC          | 39  | 42  | 16 | FPN |
| 40 | dIPFC          | 40  | 36  | 29 | FPN |
| 41 | dIPFC          | 46  | 28  | 31 | FPN |
| 42 | dIPFC          | -44 | 27  | 33 | FPN |
| 43 | vPFC           | -52 | 28  | 17 | FPN |
| 44 | ACC            | -1  | 28  | 40 | FPN |
| 45 | dFC            | 40  | 17  | 40 | FPN |
| 46 | dFC            | 44  | 8   | 34 | FPN |
| 47 | dFC            | -42 | 7   | 36 | FPN |
| 48 | IPL            | -41 | -40 | 42 | FPN |
| 49 | IPL            | 54  | -44 | 43 | FPN |
| 50 | IPL            | -48 | -47 | 49 | FPN |
| 51 | IPL            | -53 | -50 | 39 | FPN |
| 52 | IPL            | 44  | -52 | 47 | FPN |
| 53 | post parietal  | -35 | -46 | 48 | FPN |
| 54 | IPS            | -32 | -58 | 46 | FPN |
| 55 | IPS            | 32  | -59 | 41 | FPN |
| 56 | aPFC           | 27  | 49  | 26 | CON |
| 57 | vPFC           | 34  | 32  | 7  | CON |
| 58 | vFC            | 51  | 23  | 8  | CON |
| 59 | vFC            | -46 | 10  | 14 | CON |
| 60 | vFC            | -48 | 6   | 1  | CON |
| 61 | mFC            | 0   | 15  | 45 | CON |
| 62 | dACC           | 9   | 20  | 34 | CON |
| 63 | ACC            | -2  | 30  | 27 | CON |
| 64 | post cingulate | -4  | -31 | -4 | CON |
| 65 | ant insula     | 38  | 21  | -1 | CON |
| 66 | ant insula     | -36 | 18  | 2  | CON |
| 67 | mid insula     | 37  | -2  | -3 | CON |
| 68 | mid insula     | 32  | -12 | 2  | CON |
| 69 | mid insula     | -30 | -14 | 1  | CON |
| 70 | post insula    | -30 | -28 | 9  | CON |
| 71 | basal ganglia  | -6  | 17  | 34 | CON |
| 72 | basal ganglia  | -20 | 6   | 7  | CON |

|     |                |     |     |     |     |
|-----|----------------|-----|-----|-----|-----|
| 73  | basal ganglia  | 14  | 6   | 7   | CON |
| 74  | basal ganglia  | 11  | -24 | 2   | CON |
| 75  | thalamus       | -12 | -3  | 13  | CON |
| 76  | thalamus       | -12 | -12 | 6   | CON |
| 77  | thalamus       | 11  | -12 | 6   | CON |
| 78  | precuneus      | 8   | -40 | 50  | CON |
| 79  | angular gyrus  | -41 | -47 | 29  | CON |
| 80  | fusiform       | 54  | -31 | -18 | CON |
| 81  | parietal       | 58  | -41 | 20  | CON |
| 82  | parietal       | -55 | -44 | 30  | CON |
| 83  | TPJ            | -52 | -63 | 15  | CON |
| 84  | sup temporal   | 42  | -46 | 21  | CON |
| 85  | temporal       | 51  | -30 | 5   | CON |
| 86  | temporal       | 43  | -43 | 8   | CON |
| 87  | temporal       | -59 | -47 | 11  | CON |
| 88  | temporal       | 46  | -62 | 5   | ON  |
| 89  | occipital      | -18 | -50 | 1   | ON  |
| 90  | occipital      | -34 | -60 | -5  | ON  |
| 91  | occipital      | 36  | -60 | -8  | ON  |
| 92  | occipital      | -44 | -63 | -7  | ON  |
| 93  | occipital      | 19  | -66 | -1  | ON  |
| 94  | occipital      | 17  | -68 | 20  | ON  |
| 95  | occipital      | 39  | -71 | 13  | ON  |
| 96  | occipital      | 29  | -73 | 29  | ON  |
| 97  | occipital      | -29 | -75 | 28  | ON  |
| 98  | occipital      | -16 | -76 | 33  | ON  |
| 99  | occipital      | 9   | -76 | 14  | ON  |
| 100 | occipital      | 15  | -77 | 32  | ON  |
| 101 | occipital      | 20  | -78 | -2  | ON  |
| 102 | post occipital | -5  | -80 | 9   | ON  |
| 103 | post occipital | 29  | -81 | 14  | ON  |
| 104 | post occipital | 33  | -81 | -2  | ON  |
| 105 | post occipital | -37 | -83 | -2  | ON  |
| 106 | post occipital | -29 | -88 | 8   | ON  |
| 107 | post occipital | 13  | -91 | 2   | ON  |
| 108 | post occipital | 27  | -91 | 2   | ON  |
| 109 | post occipital | -4  | -94 | 12  | ON  |

|     |                  |     |     |     |     |
|-----|------------------|-----|-----|-----|-----|
| 110 | frontal          | 58  | 11  | 14  | SMN |
| 111 | frontal          | 53  | -3  | 32  | SMN |
| 112 | dFC              | 60  | 8   | 34  | SMN |
| 113 | vFC              | -55 | 7   | 23  | SMN |
| 114 | vFC              | 43  | 1   | 12  | SMN |
| 115 | pre-SMA          | 10  | 5   | 51  | SMN |
| 116 | SMA              | 0   | -1  | 52  | SMN |
| 117 | precentral gyrus | 58  | -3  | 17  | SMN |
| 118 | precentral gyrus | -44 | -6  | 49  | SMN |
| 119 | precentral gyrus | 46  | -8  | 24  | SMN |
| 120 | precentral gyrus | -54 | -9  | 23  | SMN |
| 121 | precentral gyrus | 44  | -11 | 38  | SMN |
| 122 | precentral gyrus | -54 | -22 | 22  | SMN |
| 123 | mid insula       | -42 | -3  | 11  | SMN |
| 124 | mid insula       | 33  | -12 | 16  | SMN |
| 125 | mid insula       | -36 | -12 | 15  | SMN |
| 126 | post insula      | 42  | -24 | 17  | SMN |
| 127 | parietal         | -26 | -8  | 54  | SMN |
| 128 | parietal         | -47 | -12 | 36  | SMN |
| 129 | parietal         | -38 | -15 | 59  | SMN |
| 130 | parietal         | -47 | -18 | 50  | SMN |
| 131 | parietal         | 46  | -20 | 45  | SMN |
| 132 | parietal         | -55 | -22 | 38  | SMN |
| 133 | parietal         | 41  | -23 | 55  | SMN |
| 134 | parietal         | 18  | -27 | 62  | SMN |
| 135 | parietal         | -38 | -27 | 60  | SMN |
| 136 | parietal         | -24 | -30 | 64  | SMN |
| 137 | post parietal    | -41 | -31 | 48  | SMN |
| 138 | sup parietal     | 34  | -39 | 65  | SMN |
| 139 | temporal         | 59  | -13 | 8   | SMN |
| 140 | temporal         | -54 | -22 | 9   | SMN |
| 141 | temporal         | -41 | -37 | 16  | SMN |
| 142 | temporal         | -53 | -37 | 13  | SMN |
| 143 | lat cerebellum   | -28 | -44 | -25 | CN  |
| 144 | lat cerebellum   | -24 | -54 | -21 | CN  |
| 145 | lat cerebellum   | -34 | -57 | -24 | CN  |
| 146 | lat cerebellum   | 21  | -64 | -22 | CN  |

|     |                |     |     |     |    |
|-----|----------------|-----|-----|-----|----|
| 147 | med cerebellum | -6  | -60 | -15 | CN |
| 148 | med cerebellum | -16 | -64 | -21 | CN |
| 149 | med cerebellum | 1   | -66 | -24 | CN |
| 150 | med cerebellum | -11 | -72 | -14 | CN |
| 151 | med cerebellum | 5   | -75 | -11 | CN |
| 152 | med cerebellum | 14  | -75 | -21 | CN |
| 153 | inf cerebellum | -37 | -54 | -37 | CN |
| 154 | inf cerebellum | -25 | -60 | -34 | CN |
| 155 | inf cerebellum | 32  | -61 | -31 | CN |
| 156 | inf cerebellum | -34 | -67 | -29 | CN |
| 157 | inf cerebellum | 33  | -73 | -30 | CN |
| 158 | inf cerebellum | -21 | -79 | -33 | CN |
| 159 | inf cerebellum | -6  | -79 | -33 | CN |
| 160 | inf cerebellum | 18  | -81 | -33 | CN |

**Supplementary Table 3: Demographic and behaviour variables in FC-based subtypes**

| <b>Variable</b>         | <b>Subtype 1<br/>Mean <math>\pm</math> SD<br/>[range]</b> | <b>Subtype 2<br/>Mean <math>\pm</math> SD<br/>[range]</b> | <b>Significance</b>                 |
|-------------------------|-----------------------------------------------------------|-----------------------------------------------------------|-------------------------------------|
| Age                     | 16.55 $\pm$ 6.47<br>[6.47 – 35.71]                        | 15.96 $\pm$ 5.46<br>[7.19 – 39.10]                        | $t(264) = 0.79, p = 0.43$           |
| IQ                      | 107.62 $\pm$ 14.79<br>[80 – 148]                          | 109.91 $\pm$ 13.68<br>[76 – 142]                          | $t(264) = -1.31, p = 0.19$          |
| Mean FD                 | 0.07 $\pm$ 0.03<br>[0.02 – 0.19]                          | 0.07 $\pm$ 0.04<br>[0.03 – 0.19]                          | $t(264) = 0.37, p = 0.71$           |
| Percent FD $\geq$ 0.2mm | 4.71 $\pm$ 5.10<br>[0 – 19.33]                            | 3.93 $\pm$ 4.55<br>[0 – 19.33]                            | $t(264) = 1.31, p = 0.19$           |
| Handedness              | 120 RH<br>21 LH                                           | 109 RH<br>10 LH                                           | $\chi^2(1, N=266) = 0.52, p = 0.13$ |



|                                 |                                                         |                                                         |                                     |
|---------------------------------|---------------------------------------------------------|---------------------------------------------------------|-------------------------------------|
| Eye status                      | 109 open<br>30 closed                                   | 107 open<br>20 closed                                   | $\chi^2(1, N=266) = 0.68, p = 0.27$ |
| Scan Site                       | NYU: 61<br>SDSU: 11<br>TRINITY: 17<br>UM: 26<br>USM: 24 | NYU: 50<br>SDSU: 10<br>TRINITY: 17<br>UM: 29<br>USM: 21 | $\chi^2(4, N=266) = 0.96, p = 0.92$ |
| Medication use                  | 14 yes<br>100 no/unknown                                | 13 yes<br>92 no/unknown                                 | $\chi^2(1, N=266) = 0.99, p \sim 1$ |
| Comorbidities                   | 16 yes<br>123 no/unknown                                | 12 yes<br>115 no/unknown                                | $\chi^2(1, N=266) = 1.25, p = 0.69$ |
| ADOS Total (ASD and TD)         | 11.30 $\pm$ 4.03<br>[1 – 22]<br>(N = 70)                | 9.76 $\pm$ 5.42<br>[0 – 19]<br>(N = 62)                 | $t(130) = 1.87, p = 0.06$           |
| ADOS Communication (ASD and TD) | 3.89 $\pm$ 1.61<br>[0 – 8]<br>(N = 61)                  | 3.00 $\pm$ 1.99<br>[0 – 7]<br>(N = 53)                  | $t(112) = 2.62, p = 0.01$           |
| ADOS Social (ASD and TD)        | 7.34 $\pm$ 3.14<br>[0 – 14]<br>(N = 61)                 | 6.60 $\pm$ 3.99<br>[0 – 13]<br>(N = 53)                 | $t(112) = 1.11, p = 0.27$           |
| ADOS RRB (ASD and TD)           | 1.85 $\pm$ 1.51<br>[0 – 7]<br>(N = 59)                  | 1.74 $\pm$ 1.55<br>[0 – 7]<br>(N = 53)                  | $t(110) = 0.39, p = 0.70$           |
| ADOS Total (ASD)                | 11.59 $\pm$ 3.71<br>[5 – 22]<br>(N = 68)                | 11.84 $\pm$ 3.66<br>[5 – 19]<br>(N = 50)                | $t(116) = -0.37, p = 0.71$          |
| ADOS Communication (ASD)        | 3.98 $\pm$ 1.54<br>[0 – 8]                              | 3.76 $\pm$ 1.58<br>[0 – 7]                              | $t(98) = 0.72, p = 0.47$            |

|                    |                                         |                                         |                            |
|--------------------|-----------------------------------------|-----------------------------------------|----------------------------|
|                    | (N = 59)                                | (N = 41)                                |                            |
| ADOS Social (ASD)  | 7.58 ± 2.92<br>[2 – 14]<br>(N = 59)     | 8.34 ± 2.61<br>[2 – 13]<br>(N = 41)     | $t(98) = 1.34, p = 0.18$   |
| ADOS RRB (ASD)     | 1.91 ± 1.49<br>[0 – 7]<br>(N = 57)      | 2.22 ± 1.42<br>[0 – 7]<br>(N = 41)      | $t(96) = -1.03, p = 0.31$  |
| ADI-R Social (ASD) | 19.02 ± 5.46<br>[9 – 30]<br>(N = 62)    | 19.15 ± 5.46<br>[7 – 27]<br>(N = 46)    | $t(106) = -0.13, p = 0.90$ |
| ADI-R Verbal (ASD) | 15.19 ± 4.77<br>[2 – 25]<br>(N = 62)    | 15.62 ± 3.81<br>[8 – 23]<br>(N = 47)    | $t(107) = -0.50, p = 0.62$ |
| ADI-R RRB (ASD)    | 5.65 ± 2.69<br>[0 – 12]<br>(N = 62)     | 5.68 ± 2.49<br>[1 – 12]<br>(N = 47)     | $t(107) = -0.07, p = 0.94$ |
| SRS (ASD and TD)   | 72.97 ± 44.59<br>[5 – 164]<br>(N = 72)  | 60.50 ± 49.58<br>[1 – 148]<br>(N = 66)  | $t(136) = 1.71, p = 0.09$  |
| SRS (ASD)          | 72.97 ± 44.59<br>[26 – 164]<br>(N = 51) | 60.50 ± 40.98<br>[29 – 148]<br>(N = 38) | $t(87) = 0.64, p = 0.52$   |
| SRS (TD)           | 20.95 ± 11.87<br>[5 – 46]<br>(N = 21)   | 20.32 ± 13.04<br>[1 – 56]<br>(N = 28)   | $t(47) = 0.17, p = 0.86$   |

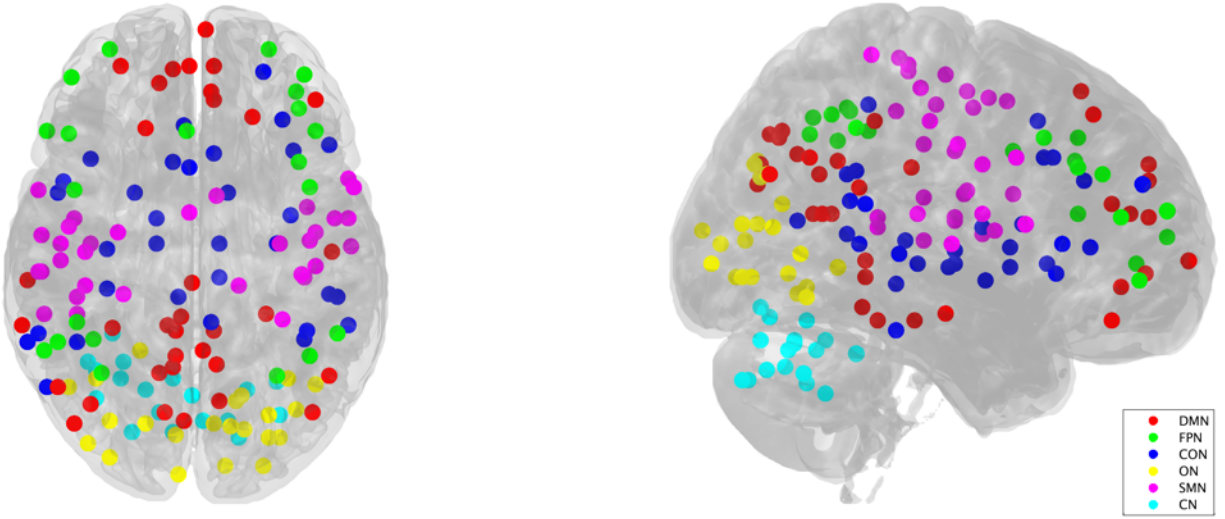

**Supplementary Figure 1.** Dosenbach ROIs.

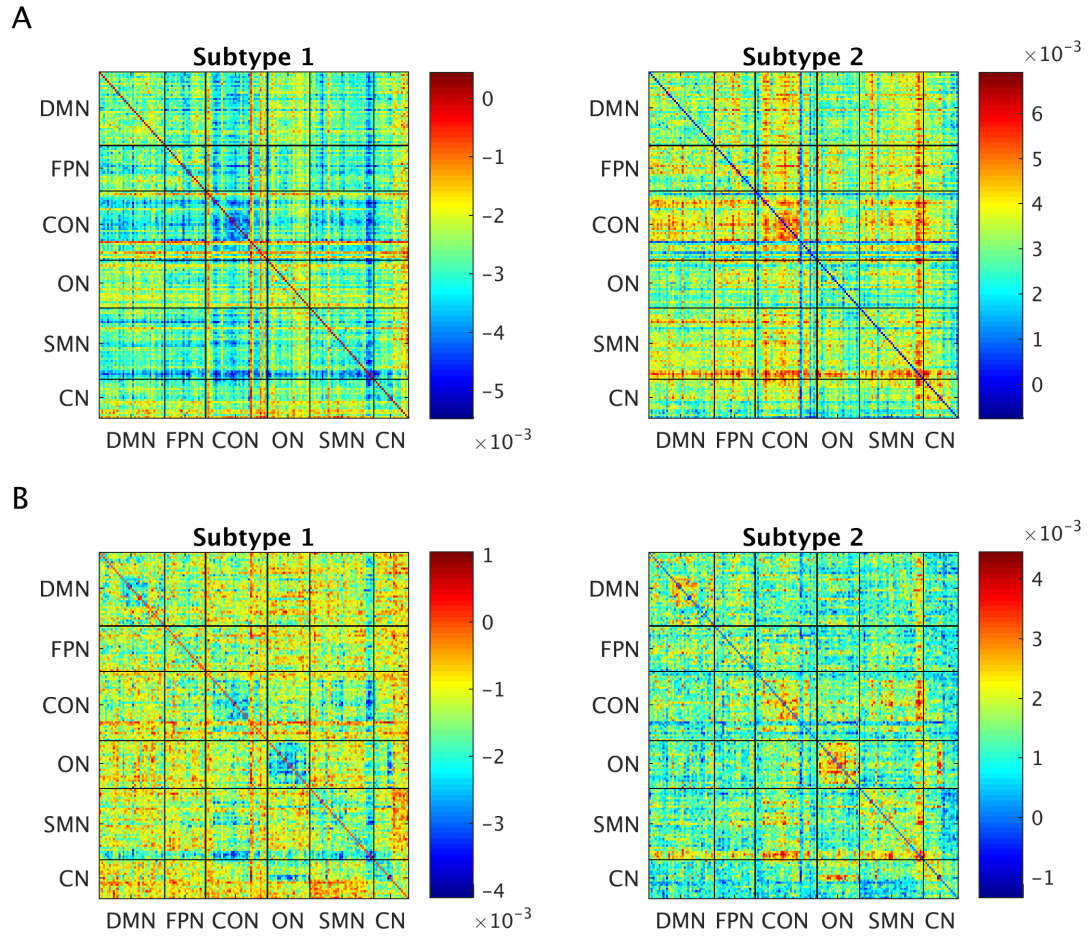

**Supplementary Figure 2.** Centroids using A) no global signal regression, B) no global signal regression + ICA AROMA.

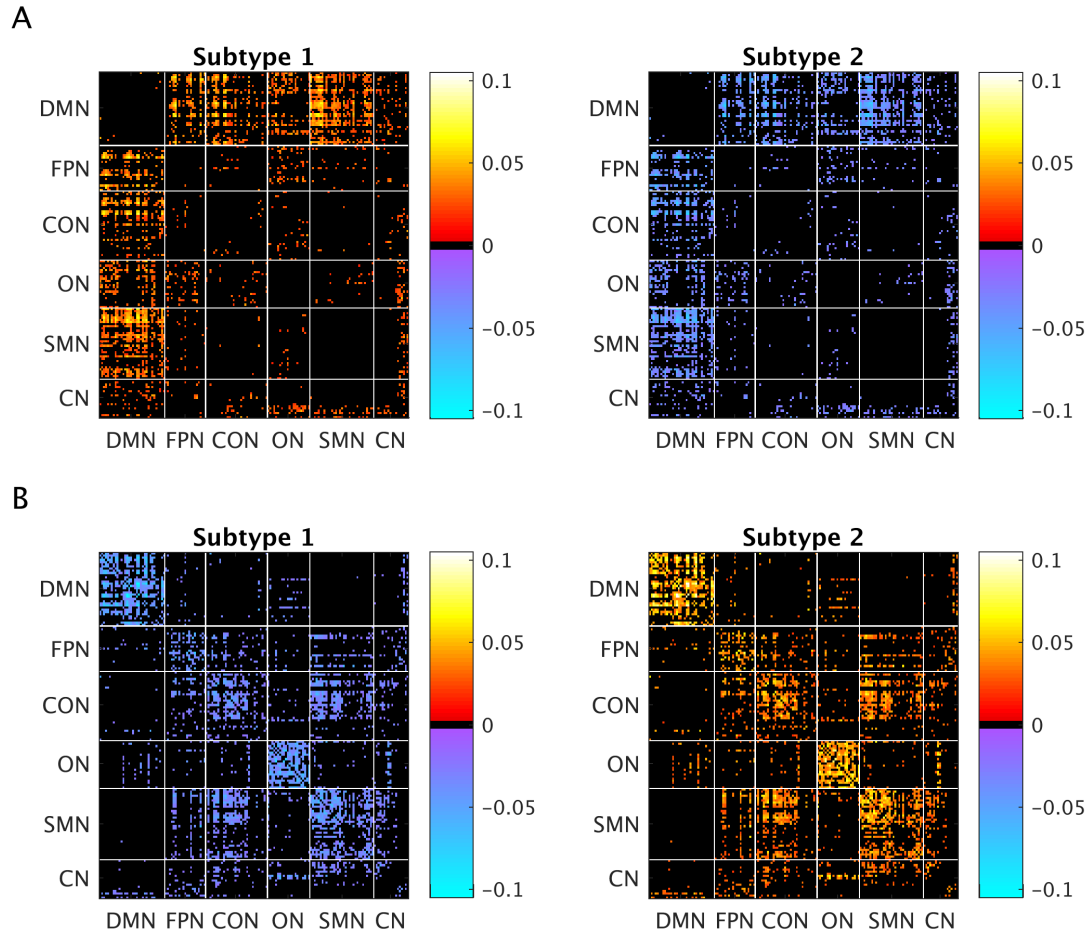

**Supplementary Figure 3.** FC contrast expressions for the first pattern from the multivariate group analysis, showing average Fisher z-transformed Pearson correlation coefficients for each subtype. A) Positive expression of the contrast (BSRs > 2). B) Negative expression of the contrast (BSRs < -2).

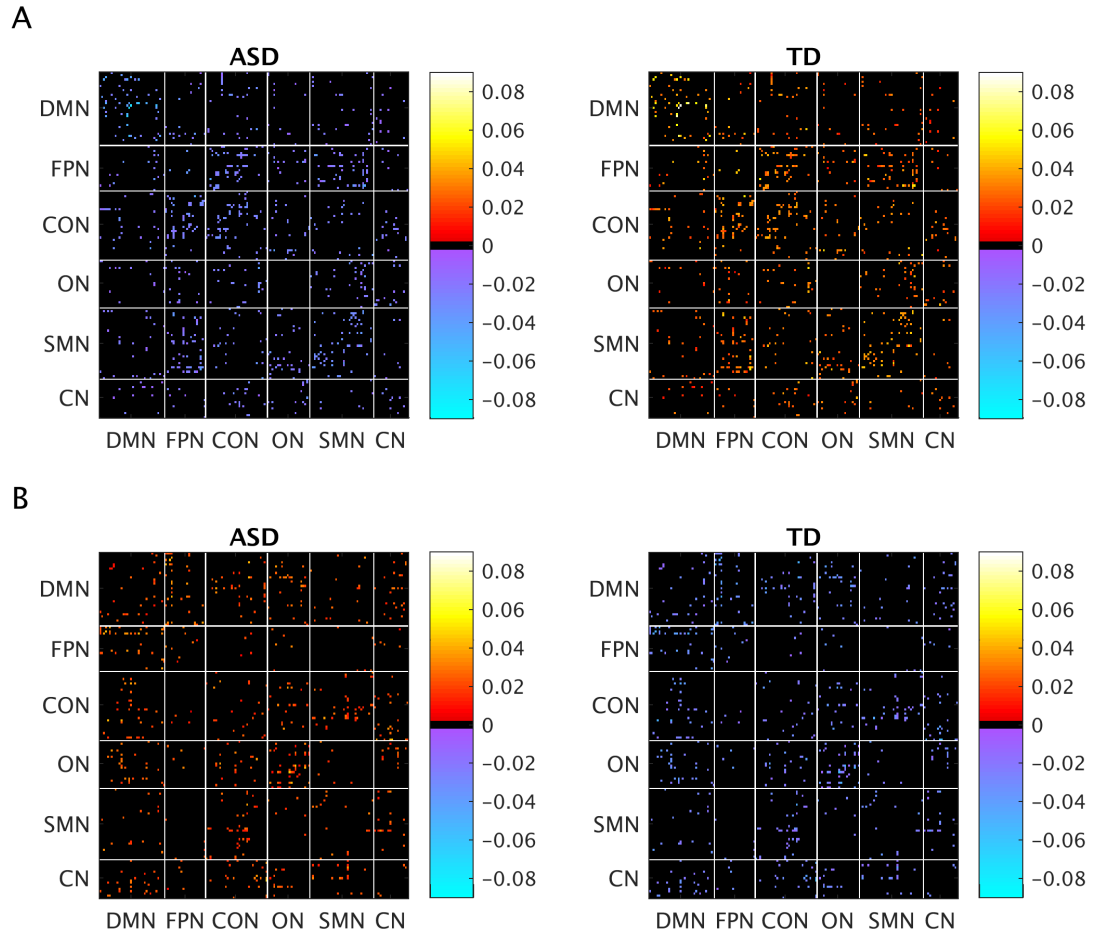

**Supplementary Figure 4.** FC contrast expressions for the second pattern from the multivariate group analysis. A) Positive expression of the contrast (BSRs > 2). B) Negative expression of the contrast (BSRs < -2).

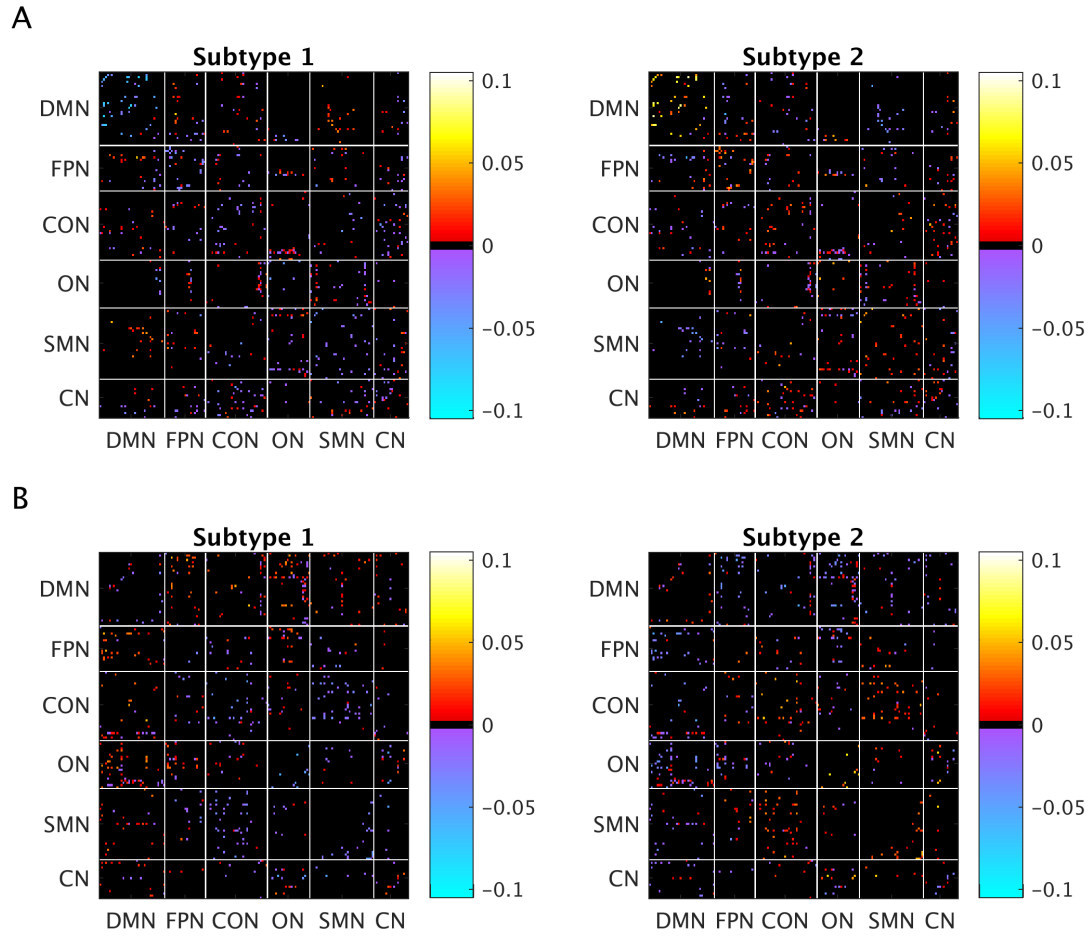

**Supplementary Figure 5.** FC contrast expressions for first pattern from the multivariate brain-behaviour analysis. A) Positive expression of the contrast (BSRs  $> 2$ ). B) Negative expression of the contrast (BSRs  $< -2$ ).

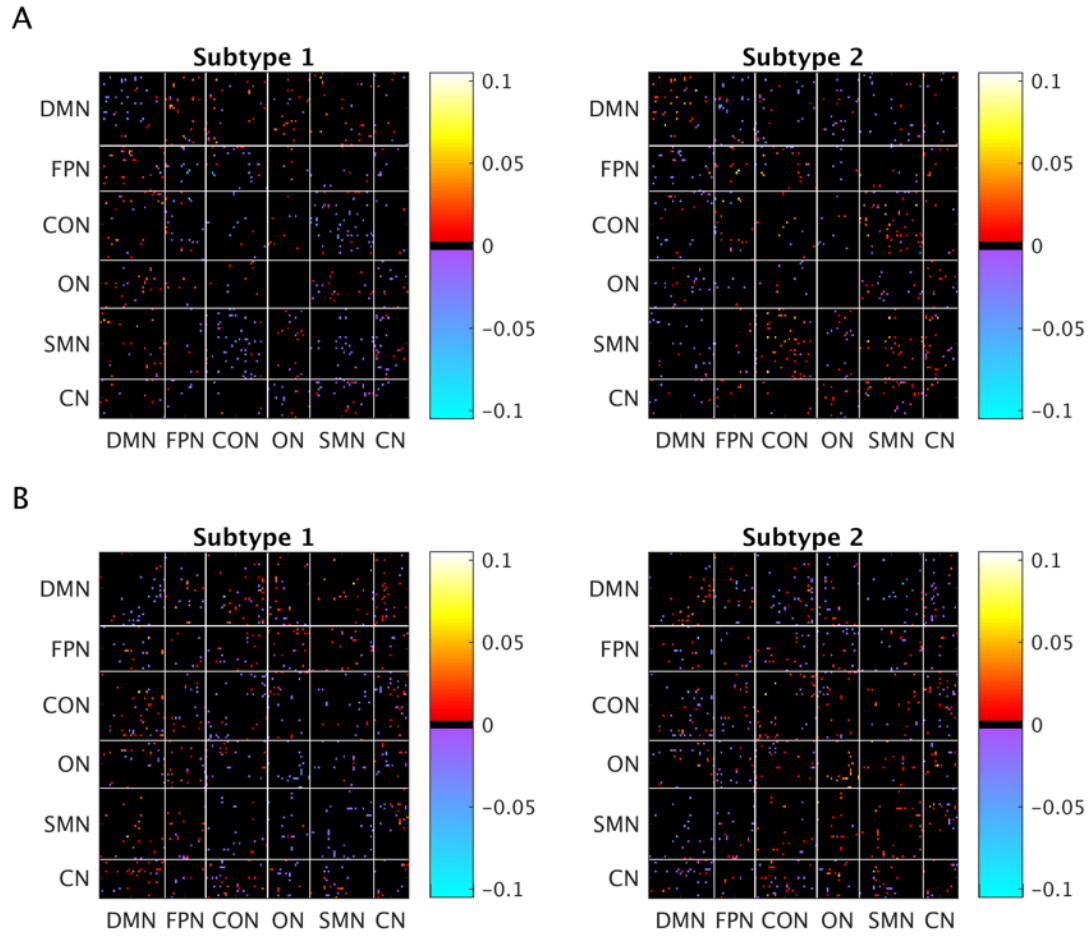

**Supplementary Figure 6.** FC contrast expressions for the third pattern from the multivariate brain-behaviour analysis. A) Positive expression of the contrast (BSRs > 2). B) Negative expression of the contrast (BSRs < -2).
